# Supplementary material for: Evidence of confinement of the π plasmon in periodically rippled graphene on Ru(0001)
Source: Royal Society of Chemistry journal article supplement (doi:10.1039/c3cp51954f), 2013-01-01
Supplement: c3cp51954f.pdf [file c3cp51954f.pdf]

## Supporting Material

### Graphene/Ru(0001)

As a consequence of the existence of ripples in monolayer graphene (MLG) on Ru(0001)<sup>1,2</sup>, the LEED pattern shows satellite spots caused by the moiré structure (Figure S1).

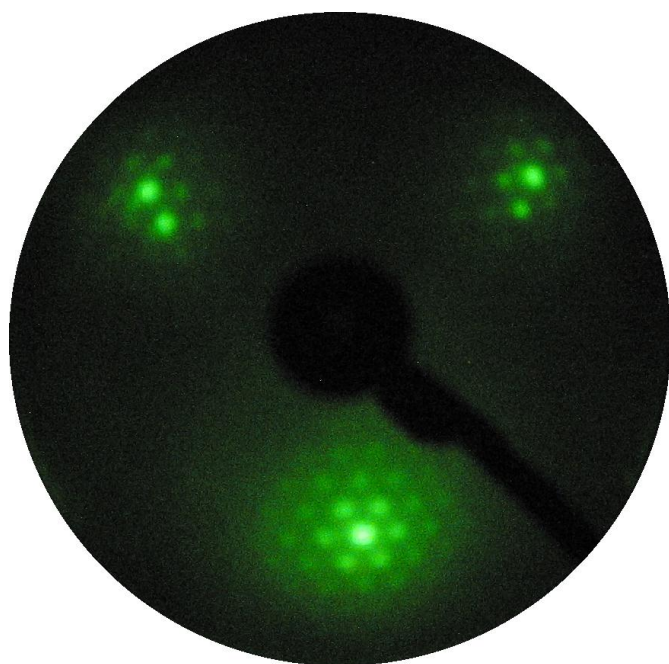

*Figure S1: LEED pattern of graphene on Ru(0001), recorded at  $E_p = 74$  eV and at room temperature.*
